# Supplementary material for: Extraction and Chemical Characterization of Functional Phenols and Proteins from Coffee (Coffea arabica) By-Products
Source: MDPI journal article supplement (doi:10.3390/biom11111571), 2021-10-22
Supplement: s1 [file s1]

**Table S1** Total amino acids determination in the enzymatic extracts

| Sample type                          | Amino acids (% w/w) |             |             |             |             |             |             |             |             |             |             |             |             |             |             |              |              |
|--------------------------------------|---------------------|-------------|-------------|-------------|-------------|-------------|-------------|-------------|-------------|-------------|-------------|-------------|-------------|-------------|-------------|--------------|--------------|
|                                      | Gly                 | Ala         | Ser         | Pro         | Val         | Thr         | Ile         | Leu         | Asp         | Lys         | Glu         | His         | Phe         | Arg         | Tyr         | Cys          | Met          |
| Coffee green beans                   | 0.66 ± 0.05         | 0.44 ± 0.02 | 0.51 ± 0.01 | 0.53 ± 0.02 | 0.58 ± 0.02 | 0.36 ± 0.01 | 0.40 ± 0.02 | 0.90 ± 0.04 | 1.03 ± 0.05 | 0.57 ± 0.01 | 2.16 ± 0.09 | 0.06 ± 0.00 | 0.53 ± 0.02 | 0.55 ± 0.03 | 0.22 ± 0.01 | 0.21 ± 0.02  | 0.16 ± 0.01  |
| Coffee silverskins                   | 0.44 ± 0.03         | 0.43 ± 0.01 | 0.45 ± 0.01 | 0.46 ± 0.02 | 0.47 ± 0.01 | 0.37 ± 0.01 | 0.40 ± 0.01 | 0.65 ± 0.02 | 0.83 ± 0.03 | 0.26 ± 0.01 | 0.78 ± 0.01 | 0.06 ± 0.00 | 0.44 ± 0.01 | 0.26 ± 0.01 | 0.18 ± 0.02 | 0.19 ± 0.02  | 0.14 ± 0.00  |
| CGB raw alcalase                     | 1.21 ± 0.11         | 0.96 ± 0.20 | 1.00 ± 0.09 | 1.19 ± 0.31 | 1.08 ± 0.10 | 0.67 ± 0.05 | 0.55 ± 0.27 | 1.59 ± 0.11 | 2.04 ± 0.58 | 1.36 ± 0.55 | 4.42 ± 0.88 | n. d.       | 0.81 ± 0.45 | n. d.       | 0.56 ± n.d. | 0.46 ± n. a. | 0.25 ± n. a. |
| CGB raw papain                       | 1.39 ± 0.18         | 0.94 ± 0.11 | 0.96 ± 0.02 | 1.11 ± 0.15 | 1.08 ± 0.01 | 0.67 ± 0.09 | 0.56 ± 0.31 | 1.58 ± 0.06 | 2.11 ± 0.38 | 1.42 ± 0.15 | 4.57 ± 0.35 | n. d.       | 0.88 ± 0.23 | n. d.       | 0.75 ± n.d. | 0.61 ± n. a. | 0.24 ± n. a. |
| CGB raw pepsin                       | 1.17 ± 0.26         | 0.89 ± 0.15 | 0.87 ± 0.12 | 1.08 ± 0.24 | 0.88 ± 0.07 | 0.60 ± 0.03 | 0.45 ± 0.23 | 1.28 ± 0.13 | 1.93 ± 0.35 | 1.17 ± 0.19 | 3.85 ± 0.36 | n. d.       | 0.69 ± 0.18 | n. d.       | 0.57 ± n.d. | 0.47 ± n. a. | 0.17 ± n. a. |
| CGB raw trypsin                      | 1.23 ± 0.10         | 0.97 ± 0.10 | 0.94 ± 0.06 | 1.09 ± 0.10 | 1.06 ± 0.05 | 0.67 ± 0.12 | 0.57 ± 0.35 | 1.56 ± 0.06 | 2.20 ± 0.29 | 1.50 ± 0.46 | 4.60 ± 0.26 | n. d.       | 0.84 ± 0.49 | n. d.       | 0.59 ± n.d. | 0.54 ± n. a. | 0.25 ± n. a. |
| CGB raw mix (alcalase + papain)      | 1.15 ± 0.14         | 0.96 ± 0.12 | 0.85 ± 0.05 | 1.02 ± 0.11 | 1.00 ± 0.00 | 0.60 ± 0.09 | 0.51 ± 0.31 | 1.46 ± 0.01 | 2.27 ± 0.34 | 1.48 ± 0.37 | 4.69 ± 0.34 | n. d.       | 0.66 ± 0.38 | n. d.       | 0.53 ± n.d. | 0.52 ± n. a. | 0.22 ± n. a. |
| CGB defatted alcalase                | 1.22 ± 0.24         | 0.94 ± 0.17 | 0.90 ± 0.04 | 1.11 ± 0.13 | 1.04 ± 0.02 | 0.64 ± 0.09 | 0.55 ± 0.32 | 1.56 ± 0.03 | 2.13 ± 0.57 | 1.41 ± 0.44 | 4.32 ± 0.58 | n. d.       | 0.82 ± 0.33 | n. d.       | 0.69 ± n.d. | 0.54 ± n. a. | 0.25 ± n. a. |
| CGB defatted papain                  | 1.50 ± 0.63         | 1.14 ± 0.46 | 1.58 ± 1.12 | 1.13 ± 0.29 | 1.15 ± 0.31 | 0.86 ± 0.31 | 0.57 ± 0.18 | 1.65 ± 0.40 | 2.24 ± 0.60 | 1.48 ± 0.41 | 4.65 ± 0.43 | n. d.       | 0.92 ± 0.07 | n. d.       | 1.20 ± n.d. | 0.69 ± n. a. | 0.25 ± n. a. |
| CGB defatted pepsin                  | 1.33 ± 0.17         | 0.91 ± 0.04 | 0.91 ± 0.01 | 1.13 ± 0.12 | 0.91 ± 0.06 | 0.63 ± 0.11 | 0.49 ± 0.31 | 1.32 ± 0.01 | 2.00 ± 0.17 | 1.23 ± 0.17 | 4.03 ± 0.09 | n. d.       | 0.72 ± 0.32 | n. d.       | 0.61 ± n.d. | 0.55 ± n. a. | 0.18 ± n. a. |
| CGB defatted trypsin                 | 1.29 ± 0.24         | 1.01 ± 0.03 | 1.02 ± 0.09 | 1.22 ± 0.20 | 1.16 ± 0.04 | 0.72 ± 0.05 | 0.62 ± 0.33 | 1.71 ± 0.03 | 2.25 ± 0.17 | 1.46 ± 0.11 | 4.71 ± 0.02 | n. d.       | 0.97 ± 0.15 | n. d.       | 0.76 ± n.d. | 0.62 ± n. a. | 0.30 ± n. a. |
| CGB defatted mix (alcalase + papain) | 1.27 ± 0.17         | 0.91 ± 0.06 | 0.96 ± 0.10 | 1.12 ± 0.18 | 1.05 ± 0.00 | 0.67 ± 0.07 | 0.55 ± 0.31 | 1.52 ± 0.03 | 2.02 ± 0.18 | 1.28 ± 0.15 | 4.46 ± 0.01 | n. d.       | 0.91 ± 0.28 | n. d.       | 0.75 ± n.d. | 0.53 ± n. a. | 0.24 ± n. a. |
| CSS alcalase                         | 0.70 ± 0.09         | 0.75 ± 0.01 | 0.72 ± 0.01 | 0.67 ± 0.02 | 0.74 ± 0.01 | 0.67 ± 0.02 | 0.71 ± 0.00 | 0.99 ± 0.02 | 1.57 ± 0.04 | 0.55 ± 0.01 | 1.47 ± 0.01 | 0.35 ± 0.04 | 0.68 ± 0.03 | 0.44 ± 0.02 | 0.53 ± 0.02 | 0.27 ± 0.02  | 0.28 ± 0.03  |
| CSS papain                           | 0.50 ± 0.01         | 0.26 ± 0.00 | 0.27 ± 0.01 | 0.23 ± 0.02 | 0.22 ± 0.02 | 0.23 ± 0.00 | 0.24 ± 0.00 | 0.27 ± 0.00 | 0.73 ± 0.01 | 0.51 ± 0.01 | 0.77 ± 0.03 | 0.26 ± 0.02 | 0.18 ± 0.00 | 0.25 ± 0.01 | 0.18 ± 0.00 | 0.30 ± n. a. | 0.10 ± n. a. |
| CSS pepsin                           | 0.42 ± 0.01         | 0.27 ± 0.00 | 0.28 ± 0.03 | 0.28 ± 0.02 | 0.21 ± 0.00 | 0.23 ± 0.01 | 0.22 ± 0.01 | 0.26 ± 0.00 | 0.68 ± 0.01 | 0.5 ± 0.01  | 0.63 ± 0.02 | 0.23 ± 0.01 | 0.16 ± 0.00 | 0.26 ± 0.02 | 0.17 ± 0.00 | 0.08 ± n. a. | 0.06 ± n. a. |
| CSS trypsin                          | 0.34 ± 0.03         | 0.28 ± 0.00 | 0.29 ± 0.01 | 0.29 ± 0.00 | 0.26 ± 0.02 | 0.25 ± 0.02 | 0.27 ± 0.01 | 0.32 ± 0.01 | 0.75 ± 0.01 | 0.47 ± 0.02 | 0.65 ± 0.01 | 0.31 ± 0.04 | 0.21 ± 0.03 | 0.35 ± 0.04 | 0.21 ± 0.00 | 0.17 ± 0.04  | 0.14 ± 0.03  |
| CSS mix (alcalase + papain)          | 0.72 ± 0.00         | 0.64 ± 0.01 | 0.6 ± 0.02  | 0.58 ± 0.01 | 0.62 ± 0.01 | 0.55 ± 0.02 | 0.6 ± 0.02  | 0.79 ± 0.02 | 1.36 ± 0.02 | 0.55 ± 0.02 | 1.3 ± 0.04  | 0.32 ± 0.04 | 0.57 ± 0.01 | 0.38 ± 0.02 | 0.43 ± 0.00 | n. a.        | n. a.        |

n. d.: not detected n. a.: not available

**Table S2** Peptide identification in the CGB enzymatic extracts

| Peptide              | -10lgP | Mass      | Length | ppm  | m/z      | RT    | Area     | Accession                                                         | PTM              |
|----------------------|--------|-----------|--------|------|----------|-------|----------|-------------------------------------------------------------------|------------------|
| NAQEPSFRFPS          | 71,27  | 1278,5992 | 11     | 1,4  | 640,3078 | 19,24 | 2,15E+06 | tr O82437 O82437_COFA:tr P93079 P93079_COFA:tr Q9ZNY2 Q9ZNY2_COFA |                  |
| NAQEPSFRFPSE         | 66,63  | 1407,6418 | 12     | 2,5  | 704,83   | 19,42 | 8,56E+05 | tr O82437 O82437_COFA:tr P93079 P93079_COFA:tr Q9ZNY2 Q9ZNY2_COFA |                  |
| AQEPSFRFPSE          | 65,28  | 1293,5989 | 11     | 1,5  | 647,8077 | 19,51 | 3,36E+05 | tr O82437 O82437_COFA:tr P93079 P93079_COFA:tr Q9ZNY2 Q9ZNY2_COFA |                  |
| NAQEPSFRFPSEAGLT     | 62,77  | 1749,8322 | 16     | 3,3  | 875,9263 | 23,23 | 4,38E+04 | tr O82437 O82437_COFA:tr P93079 P93079_COFA:tr Q9ZNY2 Q9ZNY2_COFA |                  |
| AQEPSFRFPS           | 60,23  | 1164,5563 | 10     | 1,7  | 583,2864 | 19,24 | 7,08E+05 | tr O82437 O82437_COFA:tr P93079 P93079_COFA:tr Q9ZNY2 Q9ZNY2_COFA |                  |
| NAQ(+.98)EPSFRFPS    | 56,49  | 1279,5833 | 11     | 0,4  | 640,7991 | 22,94 | 5,09E+04 | tr O82437 O82437_COFA:tr P93079 P93079_COFA:tr Q9ZNY2 Q9ZNY2_COFA | Deamidation (NQ) |
| DSIDRGNDAWKGM        | 54,23  | 1463,6462 | 13     | 1,7  | 732,8316 | 14,11 | 2,54E+05 | tr A0A068TKQ7 A0A068TKQ7_COFA:tr A8Y5V3 A8Y5V3_COFA               |                  |
| N(+.98)AQEPSFRFPS    | 48,79  | 1279,5833 | 11     | 0,4  | 640,7991 | 22,94 | 5,09E+04 | tr O82437 O82437_COFA:tr P93079 P93079_COFA:tr Q9ZNY2 Q9ZNY2_COFA | Deamidation (NQ) |
| ADVFNPR              | 44,92  | 817,4082  | 7      | 2,1  | 409,7122 | 9,58  | 7,59E+04 | tr O82437 O82437_COFA:tr P93079 P93079_COFA:tr Q9ZNY2 Q9ZNY2_COFA |                  |
| GFPDAVNHPNFP         | 42,28  | 1397,6364 | 13     | 2,7  | 699,8273 | 19,84 | 6,83E+04 | tr A0A068VDG8 A0A068VDG8_COFA                                     |                  |
| QEPSFRFPS            | 38,54  | 1093,5192 | 9      | 1,1  | 547,7675 | 19,14 | 5,90E+05 | tr O82437 O82437_COFA:tr P93079 P93079_COFA:tr Q9ZNY2 Q9ZNY2_COFA |                  |
| VDKGTVELPGTN         | 38,16  | 1228,6299 | 12     | -1,5 | 615,3213 | 13,26 | 3,53E+04 | tr A0A068V3J7 A0A068V3J7_COFA:tr A0A068UAS9 A0A068UAS9_COFA       |                  |
| QEPSFRFPSE           | 36,87  | 1222,5618 | 10     | 1,2  | 612,2889 | 19,41 | 2,39E+05 | tr O82437 O82437_COFA:tr P93079 P93079_COFA:tr Q9ZNY2 Q9ZNY2_COFA |                  |
| SENIQLPQE            | 35,42  | 985,4716  | 9      | 1,5  | 493,7438 | 17,3  | 2,03E+05 | tr O82437 O82437_COFA:tr P93079 P93079_COFA:tr Q9ZNY2 Q9ZNY2_COFA |                  |
| SIDRGNDAWKGM         | 35,32  | 1348,6194 | 12     | 2,2  | 675,3185 | 11,59 | 2,52E+04 | tr A0A068TKQ7 A0A068TKQ7_COFA:tr A8Y5V3 A8Y5V3_COFA               |                  |
| NAQEPSFRFP           | 33,55  | 1191,5673 | 10     | 1,2  | 596,7916 | 20,95 | 2,05E+04 | tr O82437 O82437_COFA:tr P93079 P93079_COFA:tr Q9ZNY2 Q9ZNY2_COFA |                  |
| KTNDNAMINPL          | 31,18  | 1229,6074 | 11     | 1,1  | 615,8116 | 17,16 | 8,82E+04 | tr O82437 O82437_COFA:tr P93079 P93079_COFA:tr Q9ZNY2 Q9ZNY2_COFA |                  |
| NAQEPSFRFPSEA        | 30,18  | 1478,679  | 13     | 7    | 740,3519 | 19,72 | 2,21E+04 | tr O82437 O82437_COFA:tr P93079 P93079_COFA:tr Q9ZNY2 Q9ZNY2_COFA |                  |
| YIGTPKGIL            | 29,57  | 1017,5858 | 10     | 2,3  | 509,8013 | 18,13 | 1,91E+04 | tr A0A068V3J7 A0A068V3J7_COFA:tr A0A068UAS9 A0A068UAS9_COFA       |                  |
| DSIDRGNDAW           | 29,07  | 1147,4894 | 10     | 2,1  | 574,7532 | 13,67 | 1,09E+05 | tr A0A068TKQ7 A0A068TKQ7_COFA:tr A8Y5V3 A8Y5V3_COFA               |                  |
| DVGRPGVQDPGVG        | 28,31  | 1251,6207 | 13     | 2,4  | 626,8192 | 11,05 | 1,46E+04 |                                                                   |                  |
| LVGKDPTDQTGID        | 28,13  | 1357,6725 | 13     | 2,3  | 679,8451 | 11,33 | 8,07E+03 |                                                                   |                  |
| SDKVQIF              | 27,35  | 835,444   | 7      | 0,8  | 418,7296 | 16,36 | 2,04E+04 | tr A0A068VDG8 A0A068VDG8_COFA                                     |                  |
| SE(+55.92)NIGLPQ     | 26,62  | 912,3487  | 8      | 1    | 457,1821 | 16,68 | 2,68E+05 | tr O82437 O82437_COFA:tr P93079 P93079_COFA:tr Q9ZNY2 Q9ZNY2_COFA |                  |
| SEEAELKYGRQEALLSEQSQ | 26,07  | 2664,2878 | 23     | 1,3  | 889,1044 | 20,92 | 2,90E+04 | tr O82437 O82437_COFA:tr P93079 P93079_COFA                       |                  |
| RQPGPIPGIN           | 23,88  | 1047,5825 | 10     | 2    | 524,7996 | 14,64 | 9,51E+03 |                                                                   |                  |
| SAYGAGVP             | 22,79  | 720,3442  | 8      | -9,2 | 361,1761 | 41,76 | 2,47E+04 |                                                                   |                  |
| QLSAERGLY            | 22,66  | 1182,6033 | 10     | 5,2  | 592,312  | 19,98 | 1,00E+04 | tr O82437 O82437_COFA:tr P93079 P93079_COFA:tr Q9ZNY2 Q9ZNY2_COFA |                  |
| FVVCEPGT             | 19,66  | 850,3895  | 8      | 0,2  | 426,2021 | 35,94 | 1,02E+05 |                                                                   |                  |
| QENIGRVL             | 19,59  | 927,5137  | 8      | 1,3  | 464,7647 | 13,68 | 2,86E+04 | tr A0A068TKQ7 A0A068TKQ7_COFA:tr A8Y5V3 A8Y5V3_COFA               |                  |

|                   |       |           |    |      |          |       |          |                                                                      |                       |
|-------------------|-------|-----------|----|------|----------|-------|----------|----------------------------------------------------------------------|-----------------------|
| LASSLNYIGGT       | 19,32 | 1094,5608 | 11 | -6,3 | 365,8586 | 11,1  | 1,60E+05 |                                                                      |                       |
| NLPDGGCGNK        | 18,38 | 973,4287  | 10 | -5,8 | 487,7188 | 31,55 | 1,17E+05 |                                                                      |                       |
| QSPTIPQ           | 18,13 | 769,397   | 7  | 0,5  | 385,706  | 16,97 | 2,68E+04 |                                                                      |                       |
| HPPLCIVSDIF       | 17,93 | 1239,6322 | 11 | 4,1  | 620,8259 | 18,59 | 1,26E+05 |                                                                      |                       |
| AVNHHPNFPS        | 17,5  | 981,4668  | 9  | 1,6  | 491,7415 | 9,88  | 1,57E+04 | tr A0A068VDG8 A0A068VDG8_COFCA                                       |                       |
| KDEGEPPK          | 17,3  | 898,4396  | 8  | 0,9  | 450,2275 | 17,51 | 2,20E+04 |                                                                      |                       |
| KCSGEPKQ          | 17,03 | 932,4385  | 9  | 6,8  | 467,2297 | 18,57 | 1,00E+05 |                                                                      |                       |
| CLDCFSAPEEVHD     | 17,03 | 1463,5697 | 13 | -3,9 | 732,7893 | 19,42 | 8,54E+04 |                                                                      |                       |
| ESGDNHEQ          | 16,48 | 914,3366  | 8  | 7,4  | 458,179  | 16,64 | 9,71E+04 |                                                                      |                       |
| ENPQNSKPDDDAS     | 15,82 | 1415,5801 | 13 | -0,3 | 708,7971 | 12,11 | 1,57E+04 |                                                                      |                       |
| NDGD(+55.92)VPL   | 15,79 | 784,2538  | 7  | 1,6  | 393,1348 | 15,73 | 2,63E+05 | tr O82437 O82437_COFAR:tr P93079 P93079_COFAR:tr Q9ZNY2 Q9ZNY2_COFAR |                       |
| ALGGFGVGLGAGV     | 15,45 | 1073,5869 | 13 | 1    | 537,8013 | 18,81 | 2,18E+04 |                                                                      |                       |
| SGYGGSKS(+79.97)G | 15,37 | 878,3171  | 9  | -8,6 | 440,162  | 26,05 | 6,54E+04 | tr A0A068TKQ7 A0A068TKQ7_COFCA                                       | Phosphorylation (STY) |
| SE(+55.92)NIGLPQE | 15,1  | 1041,3914 | 9  | 1,3  | 521,7036 | 17,3  | 1,91E+05 | tr O82437 O82437_COFAR:tr P93079 P93079_COFAR:tr Q9ZNY2 Q9ZNY2_COFAR |                       |
| LSDHNGSS          | 15,02 | 815,3409  | 8  | -4,7 | 408,6758 | 27,97 | 1,30E+05 |                                                                      |                       |

**Table S3** Peptide identification in the CSS enzymatic extracts

| Peptide           | -10lgP | Mass      | Length | PP<br>m | m/z      | RT    | Area<br>Sample | Accession                                                     | PTM |
|-------------------|--------|-----------|--------|---------|----------|-------|----------------|---------------------------------------------------------------|-----|
| IIDSGITPGHPSFSDE  | 106,76 | 1670,7787 | 16     | -0,8    | 836,3959 | 18,33 | 6,17E+06       | tr A0A068UNL8 A0A068UNL8_COFCA                                |     |
| GIIDSGITPGHPSFSDE | 98,59  | 1727,8002 | 17     | -0,3    | 864,9071 | 21,33 | 1,60E+06       | tr A0A068UNL8 A0A068UNL8_COFCA                                |     |
| VIDTGITPDHPSFSDE  | 92,13  | 1728,7842 | 16     | 1,1     | 865,4003 | 18,39 | 2,34E+06       | tr A0A068UNA6 A0A068UNA6_COFCA                                |     |
| GHVNPPRAIDPGLT    | 91,04  | 1442,7629 | 14     | -0,8    | 722,3882 | 13,81 | 1,19E+06       | tr A0A068UNL8 A0A068UNL8_COFCA                                |     |
| GHVNPPRAIDPGLTY   | 88,35  | 1605,8263 | 15     | -2      | 803,9188 | 16,84 | 1,11E+07       | tr A0A068UNL8 A0A068UNL8_COFCA                                |     |
| GAGHVNPPRAIDPGLTY | 84,36  | 1733,8849 | 17     | -0,4    | 867,9494 | 17,1  | 2,12E+06       | tr A0A068UNL8 A0A068UNL8_COFCA                                |     |
| DSGITPGHPSFSDE    | 81,71  | 1444,6106 | 14     | 0,1     | 723,3126 | 15,81 | 1,51E+06       | tr A0A068UNL8 A0A068UNL8_COFCA                                |     |
| GVIDTGITPDHPSFSDE | 80,65  | 1785,8057 | 17     | 1,8     | 893,9117 | 20,34 | 1,29E+05       | tr A0A068UNA6 A0A068UNA6_COFCA                                |     |
| FIVGPIPIINDGLGKE  | 76,28  | 1567,861  | 15     | 0,1     | 784,9379 | 27,64 | 3,98E+05       | tr A0A068V9U7 A0A068V9U7_COFCA:tr A0A068TQU2 A0A068TQU2_COFCA |     |
| SIQPVAPADPHVV     | 75,7   | 1328,7089 | 13     | -0,6    | 665,3613 | 17,02 | 3,41E+06       | tr A0A3P8MYP6 A0A3P8MYP6_COFCA:tr A0A068VCQ0 A0A068VCQ0_COFCA |     |
| IIDSGITPGHPSFS    | 75,1   | 1426,7092 | 14     | -0,4    | 714,3616 | 18,18 | 1,56E+06       | tr A0A068UNL8 A0A068UNL8_COFCA                                |     |
| VNPPRAIDPGLTY     | 72,09  | 1411,746  | 13     | -0,4    | 706,88   | 19,75 | 6,34E+06       | tr A0A068UNL8 A0A068UNL8_COFCA                                |     |
| DLLGPKPGQPLDE     | 71,58  | 1377,714  | 13     | -0,4    | 689,864  | 19,58 | 6,78E+06       | tr A0A068UNL8 A0A068UNL8_COFCA                                |     |
| IIDSGITPGHPS      | 71,31  | 1192,6088 | 12     | -0,4    | 597,3114 | 12,05 | 1,14E+07       | tr A0A068UNL8 A0A068UNL8_COFCA                                |     |
| GITPGHPSFSDE      | 71,26  | 1242,5516 | 12     | -1,4    | 622,2822 | 13,45 | 8,43E+06       | tr A0A068UNL8 A0A068UNL8_COFCA                                |     |
| SIQPVAPADPH       | 69,47  | 1130,572  | 11     | 0,5     | 566,2936 | 10,31 | 1,62E+06       | tr A0A3P8MYP6 A0A3P8MYP6_COFCA:tr A0A068VCQ0 A0A068VCQ0_COFCA |     |
| GGPSKLPFFDDPIAL   | 67,89  | 1572,8187 | 15     | -1,3    | 787,4156 | 33,44 | 6,78E+06       | tr A0A068UNL8 A0A068UNL8_COFCA                                |     |
| GIIDSGITPGHPSFS   | 67,69  | 1483,7307 | 15     | -0,9    | 742,8719 | 21,33 | 4,46E+05       | tr A0A068UNL8 A0A068UNL8_COFCA                                |     |
| IDSGITPGHPS       | 64,71  | 1079,5247 | 11     | 0,1     | 540,7697 | 7,76  | 6,74E+04       | tr A0A068UNL8 A0A068UNL8_COFCA                                |     |

|                             |       |           |    |      |          |       |          |                                                                                      |                                 |
|-----------------------------|-------|-----------|----|------|----------|-------|----------|--------------------------------------------------------------------------------------|---------------------------------|
| GAGHVNPPRAIDPGLT            | 64,4  | 1570,8215 | 16 | -0,6 | 786,4176 | 14,24 | 4,78E+05 | tr A0A068UNL8 A0A068UNL8_COFCA                                                       |                                 |
| VGDP RPQPNGEDM(+15.99)GNFY  | 64,17 | 1810,7581 | 16 | 0    | 906,3863 | 13,79 | 7,08E+05 | tr A0A068VNV4 A0A068VNV4_COFCA                                                       | Oxidation (M)                   |
| RLPGQPDGVDFN                | 61,62 | 1313,6364 | 12 | -1,4 | 657,8245 | 17    | 4,41E+05 | tr A0A068TZK8 A0A068TZK8_COFCA:tr A0A068TYK8 A0A068TYK8_COFCA                        |                                 |
| SGITPGHPSFSDE               | 60,14 | 1329,5836 | 13 | -1   | 665,7984 | 13,63 | 4,52E+06 | tr A0A068UNL8 A0A068UNL8_COFCA                                                       |                                 |
| WVGDP RPQPNGEDM(+15.99)     | 59,3  | 1515,6412 | 13 | -1,9 | 758,8264 | 11,18 | 8,33E+05 | tr A0A068VNV4 A0A068VNV4_COFCA                                                       | Oxidation (M)                   |
| GKLIGDPSFGLPF               | 56,72 | 1346,7234 | 13 | -0,1 | 674,3689 | 31,37 | 2,42E+06 | tr A0A068VNV4 A0A068VNV4_COFCA                                                       |                                 |
| WVGDP RPQPNGEDM(+15.99)GNFY | 55,95 | 1996,8373 | 17 | -1,7 | 999,4242 | 19,28 | 5,81E+05 | tr A0A068VNV4 A0A068VNV4_COFCA                                                       | Oxidation (M)                   |
| WGEDGYIR                    | 54,96 | 994,4508  | 8  | -0,5 | 498,2325 | 14,57 | 3,72E+06 | tr A0A068TZE0 A0A068TZE0_COFCA                                                       |                                 |
| RAGDAPSPGAGSIE              | 54,23 | 1283,6106 | 14 | -1,9 | 642,8113 | 7,74  | 0        | tr A0A068VNV4 A0A068VNV4_COFCA                                                       |                                 |
| DTGITPDHPSFSDE              | 54,11 | 1516,6317 | 14 | 1,8  | 759,3245 | 15,76 | 1,81E+05 | tr A0A068UNA6 A0A068UNA6_COFCA                                                       |                                 |
| KPDII GPGVN                 | 52,96 | 1008,5604 | 10 | -0,7 | 505,2871 | 12,81 | 3,39E+06 | tr A0A068UNL8 A0A068UNL8_COFCA:tr A0A068UNA6 A0A068UNA6_COFCA                        |                                 |
| PADDP RN F                  | 52,52 | 930,4195  | 8  | -0,5 | 466,2168 | 15,08 | 6,13E+05 | tr A0A068VNV4 A0A068VNV4_COFCA                                                       |                                 |
| GHVNPPRAID                  | 52,45 | 1074,557  | 10 | 1    | 538,2863 | 6,01  | 1,88E+05 | tr A0A068UNL8 A0A068UNL8_COFCA                                                       |                                 |
| NASPGILKPD                  | 51,11 | 1010,5396 | 10 | 0,1  | 506,2771 | 11,72 | 7,75E+05 | tr A0A068UNL8 A0A068UNL8_COFCA                                                       |                                 |
| PRQPNGEDM(+15.99)GNFY       | 51,06 | 1539,6412 | 13 | -2,6 | 770,8259 | 11,05 | 3,23E+05 | tr A0A068VNV4 A0A068VNV4_COFCA                                                       | Oxidation (M)                   |
| GPKPGQPLDE                  | 49,36 | 1036,5189 | 10 | 2,1  | 519,2678 | 6,87  | 3,52E+04 | tr A0A068UNL8 A0A068UNL8_COFCA                                                       |                                 |
| GAGHVNPPRAID                | 48,34 | 1202,6156 | 12 | 2,6  | 602,3167 | 6,38  | 1,94E+05 | tr A0A068UNL8 A0A068UNL8_COFCA                                                       |                                 |
| AIPHIPIH                    | 48,19 | 896,5232  | 8  | -1,5 | 449,2682 | 14,58 | 4,77E+06 | tr A0A068VNV4 A0A068VNV4_COFCA                                                       |                                 |
| HVNPPRAIDPGLTY              | 46,82 | 1548,8048 | 14 | -0,2 | 775,4095 | 16,84 | 4,77E+05 | tr A0A068UNL8 A0A068UNL8_COFCA                                                       |                                 |
| ALPADDP RN F                | 46,7  | 1114,5406 | 10 | -0,1 | 558,2775 | 15,13 | 1,49E+07 | tr A0A068VNV4 A0A068VNV4_COFCA                                                       |                                 |
| VVDQVRVE                    | 46,4  | 942,5134  | 8  | 0    | 472,264  | 8,57  | 2,44E+05 | tr D7REL9 D7REL9_COFAR:tr A0A068VB43 A0A068VB43_COFCA:tr A0A068V8L2 A0A068V8L2_COFCA |                                 |
| SIQPVAPADPRVA               | 45,46 | 1319,7197 | 13 | -0,5 | 660,8668 | 14,7  | 7,71E+05 | tr A0A068VCC7 A0A068VCC7_COFCA                                                       |                                 |
| GITPDHPSFSDE                | 44,75 | 1300,5571 | 12 | -1,4 | 651,2849 | 14,24 | 1,72E+06 | tr A0A068UNA6 A0A068UNA6_COFCA                                                       |                                 |
| GIIDSGITPGHPS               | 44,49 | 1249,6302 | 13 | -1,6 | 625,8214 | 16,11 | 3,63E+06 | tr A0A068UNL8 A0A068UNL8_COFCA                                                       |                                 |
| SRGPNNASPGIL                | 43,68 | 1181,6152 | 12 | -1   | 591,8143 | 13,42 | 7,82E+05 | tr A0A068UNL8 A0A068UNL8_COFCA                                                       |                                 |
| PRQPN(+.98)GEDM(+15.99)GNFY | 42,07 | 1540,6252 | 13 | -0,6 | 771,3195 | 12,12 | 2,65E+04 | tr A0A068VNV4 A0A068VNV4_COFCA                                                       | Deamidation (NQ); Oxidation (M) |
| DLLGPK(+58.01)PGQPLDE       | 40,46 | 1435,7194 | 13 | -1   | 718,8662 | 22,06 | 4,44E+05 | tr A0A068UNL8 A0A068UNL8_COFCA                                                       | Carboxymethyl (KW, X@N-term)    |
| GGPSK(+58.01)LPFFDDPIAL     | 40,02 | 1630,8242 | 15 | -0,4 | 816,4191 | 36,85 | 1,13E+06 | tr A0A068UNL8 A0A068UNL8_COFCA                                                       | Carboxymethyl (KW, X@N-term)    |
| KGAVLPVKDQ                  | 39,79 | 1053,6182 | 10 | -0,1 | 527,8163 | 6,25  | 7,69E+04 | tr A0A068TZE0 A0A068TZE0_COFCA                                                       |                                 |
| WVGDP RPQPNGE               | 38,92 | 1253,5789 | 11 | 0,5  | 627,797  | 10,31 | 2,35E+05 | tr A0A068VNV4 A0A068VNV4_COFCA                                                       |                                 |
| VNPPRAIDPGLT                | 38,89 | 1248,6826 | 12 | -0,4 | 625,3483 | 16,56 | 3,23E+06 | tr A0A068UNL8 A0A068UNL8_COFCA                                                       |                                 |
| SSRGPNNASPGIL               | 38,69 | 1268,6472 | 13 | -1,1 | 635,3302 | 13,24 | 1,92E+06 | tr A0A068UNL8 A0A068UNL8_COFCA                                                       |                                 |
| SSRGPN(+.98)NASPGIL         | 37,92 | 1269,6313 | 13 | -2,3 | 635,8215 | 14,24 | 7,28E+05 | tr A0A068UNL8 A0A068UNL8_COFCA                                                       | Deamidation (NQ)                |
| GHVNPPRAIDPGL               | 37,43 | 1341,7153 | 13 | 4,1  | 671,8677 | 14,52 | 0        | tr A0A068UNL8 A0A068UNL8_COFCA                                                       |                                 |
| TIDRDIRAT                   | 37,19 | 1059,5673 | 9  | -0,5 | 530,7906 | 5,73  | 6,38E+05 | tr A0A068UNL8 A0A068UNL8_COFCA                                                       |                                 |
| RNDGHIL                     | 35,67 | 823,4301  | 7  | -1,1 | 412,7219 | 6,31  | 6,79E+05 | tr A0A068UNL8 A0A068UNL8_COFCA                                                       |                                 |
| DLLGPKPGQPL                 | 35,27 | 1133,6444 | 11 | -0,6 | 567,8292 | 20,91 | 5,87E+06 | tr A0A068UNL8 A0A068UNL8_COFCA                                                       |                                 |
| GGPSK(+14.02)LPFFDDPIAL     | 34,47 | 1586,8344 | 15 | 1,1  | 794,4254 | 33,48 | 2,77E+05 | tr A0A068UNL8 A0A068UNL8_COFCA                                                       | Methylation(KR)                 |
| LGP KPGQPLDE                | 34,37 | 1149,6029 | 11 | -1,4 | 575,8079 | 12,38 | 4,04E+05 | tr A0A068UNL8 A0A068UNL8_COFCA                                                       |                                 |
| DALPGLTY                    | 33,07 | 848,428   | 8  | 0,5  | 425,2215 | 20,22 | 1,24E+06 | tr A0A068VEK9 A0A068VEK9_COFCA                                                       |                                 |
| GGGGAGAGRGPIA               | 32,77 | 1109,5941 | 14 | 0,2  | 555,8044 | 11,35 | 1,53E+05 | tr A0PD76 A0PD76_COFAR:tr A0A068VDT0 A0A068VDT0_COFCA:tr A0A068VAJ2 A0A068VAJ2_COFCA |                                 |
| VYPGM(+15.99)NGDQF          | 32,24 | 1142,4702 | 10 | 0,4  | 572,2426 | 16,49 | 7,56E+05 | tr A0A068UNA6 A0A068UNA6_COFCA                                                       | Oxidation (M)                   |
| TGITPDHPSFSDE               | 31,82 | 1401,6049 | 13 | -1,2 | 701,8089 | 14,84 | 7,16E+04 | tr A0A068UNA6 A0A068UNA6_COFCA                                                       |                                 |
| KLFFDDPIAL                  | 31,43 | 1274,691  | 11 | -0,4 | 638,3525 | 33,61 | 4,76E+06 | tr A0A068UNL8 A0A068UNL8_COFCA                                                       |                                 |
| GITPGHPSFS                  | 30,52 | 998,4821  | 10 | -0,8 | 500,2479 | 12,72 | 7,33E+05 | tr A0A068UNL8 A0A068UNL8_COFCA                                                       |                                 |

|                             |       |           |    |      |          |       |          |                                                               |                                   |
|-----------------------------|-------|-----------|----|------|----------|-------|----------|---------------------------------------------------------------|-----------------------------------|
| KALPADDPRNF                 | 30,36 | 1242,6356 | 11 | -0,6 | 622,3247 | 10,99 | 4,84E+05 | tr A0A068VNV4 A0A068VNV4_COFCA                                |                                   |
| SIQPVAPADPR                 | 29,61 | 1149,6141 | 11 | 0,8  | 575,8148 | 10,6  | 5,80E+05 | tr A0A068VCC7 A0A068VCC7_COFCA                                |                                   |
| GGPSK(+72.02)LPFFDDPIAL     | 28,43 | 1644,8398 | 15 | -0,2 | 823,4271 | 37,03 | 2,46E+05 | tr A0A068UNL8 A0A068UNL8_COFCA                                | Carboxyethyl                      |
| RWVGDPRPQPNGEDM(+15.99)     | 28,2  | 1671,7423 | 14 | 0,3  | 558,2549 | 7,48  | 4,59E+05 | tr A0A068VNV4 A0A068VNV4_COFCA                                | Oxidation (M)                     |
| NLPVRVAPQ                   | 28,18 | 992,5767  | 9  | -2,9 | 497,2942 | 13,24 | 1,18E+06 | tr A0A068V471 A0A068V471_COFCA                                |                                   |
| SVVNAKF                     | 26,46 | 763,4228  | 7  | -1,1 | 382,7183 | 18,45 | 1,13E+06 | tr A0A068UQI2 A0A068UQI2_COFCA                                |                                   |
| EITGSVHLVG                  | 25,69 | 1010,5397 | 10 | 0    | 506,2771 | 11,72 | 7,75E+05 | tr A0A068V1G4 A0A068V1G4_COFCA                                |                                   |
| DSGITPGHPS                  | 24,91 | 966,4407  | 10 | -2,7 | 484,2263 | 6,4   | 5,27E+04 | tr A0A068UNL8 A0A068UNL8_COFCA                                |                                   |
| SAGRDIVFY                   | 24,46 | 1026,5134 | 9  | -1,8 | 514,2631 | 18,84 | 1,48E+06 | tr A0A068VNV4 A0A068VNV4_COFCA                                |                                   |
| VLATHMIL                    | 24,35 | 896,5154  | 8  | 7,3  | 449,2682 | 15,33 | 6,26E+05 | tr A0A068TQZ9 A0A068TQZ9_COFCA                                |                                   |
| SIQPVAPADPH(+72.02)VVG      | 24,22 | 1457,7513 | 14 | 2,8  | 729,885  | 16,37 | 1,35E+05 | tr A0A3P8MYP6 A0A3P8MYP6_COFCA:tr A0A068VCQ0 A0A068VCQ0_COFCA | Ethoxyformylation                 |
| RVLDSNNVNVNPPDE             | 24,04 | 1566,7638 | 14 | -2   | 784,3876 | 13,83 | 8,80E+04 | tr A0A068UJ50 A0A068UJ50_COFCA                                |                                   |
| NAQEPSFRFPS                 | 23,37 | 1278,5992 | 11 | -0,4 | 640,3066 | 19,66 | 1,56E+06 |                                                               |                                   |
| PIFAVGPLHK                  | 22,44 | 1077,6334 | 10 | -4,6 | 539,8215 | 19,57 | 1,20E+06 |                                                               |                                   |
| LPFFDD(+55.92)PIAL          | 22,18 | 1202,5157 | 10 | -0,2 | 602,265  | 39,55 | 7,57E+05 | tr A0A068UNL8 A0A068UNL8_COFCA                                |                                   |
| GGPSKLPF                    | 21,8  | 801,4385  | 8  | -1,7 | 401,7258 | 17,43 | 2,23E+06 | tr A0A068UNL8 A0A068UNL8_COFCA                                |                                   |
| FDDPIAL                     | 21,73 | 789,3908  | 7  | -1,8 | 395,702  | 27,73 | 4,35E+05 | tr A0A068UNL8 A0A068UNL8_COFCA                                |                                   |
| ADNAAGRRPGYGVV              | 21,54 | 1401,7113 | 14 | -0,7 | 701,8624 | 7,78  | 2,88E+05 |                                                               |                                   |
| KLEGVSITTY                  | 21,24 | 1109,5968 | 10 | -2,2 | 555,8044 | 11,35 | 1,53E+05 |                                                               |                                   |
| RKGTISGSFVP                 | 21,1  | 1147,6349 | 11 | -0,9 | 574,8242 | 17,6  | 4,80E+05 |                                                               |                                   |
| LRITDGKSN                   | 21,01 | 1002,5458 | 9  | 3,6  | 502,282  | 18,89 | 2,14E+06 |                                                               |                                   |
| GPNNASPGILKPD               | 20,96 | 1278,6567 | 13 | -3,6 | 640,3334 | 12,58 | 1,66E+05 | tr A0A068UNL8 A0A068UNL8_COFCA                                |                                   |
| WVGDPRPQN(+.98)GEDM(+15.99) | 20,19 | 1516,6252 | 13 | -4   | 759,3169 | 11,31 | 0        | tr A0A068VNV4 A0A068VNV4_COFCA                                | Deamidation (NQ); Oxidation (M)   |
| LP PPPPNPNP                 | 20,07 | 1038,5498 | 10 | 6,4  | 520,2855 | 12,36 | 1,58E+05 |                                                               |                                   |
| SK(+14.02)ANDPGLVN(+.98)C   | 19,6  | 1131,5229 | 11 | -4,2 | 566,7664 | 9,64  | 3,33E+04 |                                                               | Methylation(KR); Deamidation (NQ) |
| MHGCSASALIVHA               | 19,22 | 1382,6434 | 14 | -1,3 | 692,3281 | 14,22 | 0        |                                                               |                                   |
| VNRN(+.98)DGHIL             | 19,03 | 1037,5254 | 9  | -3,8 | 519,768  | 7,77  | 0        | tr A0A068UNL8 A0A068UNL8_COFCA                                | Deamidation (NQ)                  |
| PAAIKSAIMTTAT               | 19,01 | 1274,6904 | 13 | -0,3 | 638,3523 | 34,61 | 4,67E+05 |                                                               |                                   |
| PAAIKSALMTTAT               | 19,01 | 1274,6904 | 13 | -0,3 | 638,3523 | 34,61 | 4,67E+05 |                                                               |                                   |
| LSTSAAAAATAAVEAAGA          | 18,93 | 1502,7576 | 18 | 0,3  | 501,9266 | 7,26  | 1,45E+05 |                                                               |                                   |
| QGAQGPPMML                  | 18,8  | 994,4906  | 10 | -1,6 | 498,2518 | 10,72 | 2,58E+05 |                                                               |                                   |
| YCPAVCSY                    | 18,54 | 904,3459  | 8  | 2    | 453,1811 | 20,25 | 5,38E+05 |                                                               |                                   |
| GYTKGDGLGAEIV               | 18,48 | 1278,6455 | 13 | 5,2  | 640,3334 | 12,58 | 1,66E+05 |                                                               |                                   |
| AGRRPGYGVVT                 | 18,32 | 1131,6149 | 11 | -1,1 | 566,8141 | 6,12  | 9,75E+04 |                                                               |                                   |
| NGSGGPQF                    | 18,26 | 762,3297  | 8  | 0,5  | 382,1723 | 7,04  | 3,10E+05 |                                                               |                                   |
| KLPPPPKVN                   | 17,86 | 988,6069  | 9  | -1,2 | 495,3102 | 7,41  | 7,80E+05 |                                                               |                                   |
| TSSSLPLVGK                  | 17,77 | 987,5601  | 10 | -3,2 | 494,7857 | 16,53 | 0        |                                                               |                                   |
| GEGGGYGKGGGAGVGGGYGGG       | 17,73 | 1983,8306 | 26 | -2   | 992,9205 | 17,95 | 3,12E+06 |                                                               |                                   |
| GEGGG                       |       |           |    |      |          |       |          |                                                               |                                   |
| LRAGVGPAVP                  | 17,61 | 935,5552  | 10 | 0,1  | 468,7849 | 19,83 | 6,71E+05 |                                                               |                                   |
| ADNIRPTDLDM                 | 17,6  | 1259,5815 | 11 | -5,4 | 630,7946 | 8,01  | 0        |                                                               |                                   |
| GGYGGGGEAGGGYGKGG           | 17,45 | 1356,5693 | 17 | -8   | 679,2865 | 10,52 | 6,82E+04 |                                                               |                                   |
| PGTSSGAIASPLGPGG            | 17,38 | 1324,6622 | 16 | 4    | 442,5631 | 5,86  | 0        |                                                               |                                   |
| RWVGDPRPQPNGEDM(+15.99)GNFY | 17,35 | 2152,9385 | 18 | -0,2 | 718,6533 | 16,35 | 1,92E+05 | tr A0A068VNV4 A0A068VNV4_COFCA                                | Oxidation (M)                     |

|                      |       |           |    |      |          |       |          |                                    |                                       |
|----------------------|-------|-----------|----|------|----------|-------|----------|------------------------------------|---------------------------------------|
| LPPFDDPIALGA(+28.03) | 17,28 | 1302,6859 | 12 | 5,8  | 652,354  | 30,95 | 1,83E+05 | tr   A0A068UNL8   A0A068UNL8_COFCA | Ethylation                            |
| DSIATSGTDE           | 17,12 | 994,4091  | 10 | 2,3  | 498,213  | 10,88 | 7,24E+03 |                                    |                                       |
| ETGPAIS              | 17,11 | 673,3282  | 7  | -5   | 337,6697 | 5,47  | 0        |                                    |                                       |
| NVVPAPAP             | 16,79 | 763,4228  | 8  | -0,8 | 382,7184 | 20,21 | 1,80E+06 |                                    |                                       |
| LNTSVGVLECK          | 16,73 | 1161,6063 | 11 | -0,4 | 581,8102 | 37,9  | 2,42E+06 |                                    |                                       |
| EMAYDALKEEG          | 16,7  | 1254,5438 | 11 | 4,1  | 628,2817 | 12,49 | 3,79E+05 |                                    |                                       |
| PSLSTPSASLLG         | 16,65 | 1128,6027 | 12 | 1,6  | 565,3095 | 17,19 | 5,14E+05 |                                    |                                       |
| SVALKNF              | 16,57 | 777,4385  | 7  | 1    | 389,7269 | 18,47 | 0        |                                    |                                       |
| EALLLRPL             | 16,38 | 923,5804  | 8  | -1,4 | 462,7968 | 23,1  | 1,08E+06 | tr   A0A068VNV4   A0A068VNV4_COFCA | Deamidation followed by a methylation |
| VDIPWVK              | 16,21 | 855,4854  | 7  | 0    | 428,75   | 22,27 | 1,39E+06 |                                    |                                       |
| NVFATGAGHVN(+15.00)P | 15,98 | 1197,5778 | 12 | -0,2 | 599,796  | 6,2   | 4,87E+05 |                                    |                                       |
| EDAVPSPPIILLP        | 15,94 | 1246,6809 | 12 | -2,2 | 624,3464 | 11,52 | 8,27E+04 |                                    |                                       |
| DLLGNGTPR            | 15,76 | 941,493   | 9  | -0,7 | 471,7535 | 5,73  | 5,64E+04 |                                    |                                       |
| SSPGKGKSGSAWGA       | 15,54 | 1275,6207 | 14 | -1,5 | 638,8167 | 14,57 | 9,59E+05 |                                    |                                       |
| SIAGGTGSGMGSY        | 15,47 | 1143,4866 | 13 | -1,1 | 572,7499 | 10,66 | 8,16E+04 |                                    |                                       |
| SGADDRQVK            | 15,12 | 974,4781  | 9  | 1,5  | 488,2471 | 12,5  | 8,39E+05 |                                    |                                       |
| KPITNPPIPA           | 15,1  | 1046,6124 | 10 | -1   | 524,313  | 10,43 | 1,91E+05 |                                    |                                       |
